# Supplementary material for: Sonochemical production of nanoscaled crystalline cellulose using organic acids
Source: Royal Society of Chemistry journal article supplement (doi:10.1039/d0gc01283a), 2020-01-01
Supplement: d0gc01283a1.pdf [file d0gc01283a1.pdf]

## Sonochemical production of nanoscaled crystalline cellulose using organic acids

Eduardo Robles<sup>a,b</sup>, Nagore Izaguirre<sup>a</sup>, Bianca-Ioana Dogaru<sup>a,c</sup>, Carmen-Mihaela Popescu<sup>c</sup>, Irati Barandiaran<sup>d</sup>, Jalel Labidi<sup>a</sup>

The present information corresponds to the supplementary material of the article with the same title. In this file, more information regarding the Fourier Transform Infrared Analysis, Atomic Force Microscopy, Thermogravimetric Analysis, as well as crystallinity analysis, are displayed. The purpose of the current material is to contribute to the better elucidation of the article mentioned above.

---

<sup>a</sup> *Biorefinery Processes Research Group, Chemical & Environmental Engineering Department, Faculty of Engineering, Gipuzkoa, University of the Basque Country UPV/EHU, Plaza Europa 1, 20018 Donostia, Spain.*

<sup>b</sup> *CNRS/Univ Pau & Pays Adour/E2S UPPA, Institute of Analytical and Physicochemical Sciences for the Environment and Materials (IPREM-UMR 5254), IUT of the Pays de l'Adour, 371 Rue de Ruisseau, 40004 Mont de Marsan, France.*

<sup>c</sup> *"Petru Poni" Institute of Macromolecular Chemistry, 41 A, Grigore Ghica Voda Alley, 700487 Iasi, Romania*

<sup>d</sup> *Materials + Technology Research Group, Chemical & Environmental Engineering Department, Faculty of Engineering, Gipuzkoa, University of the Basque Country UPV/EHU, Plaza Europa 1, 20018 Donostia, Spain*

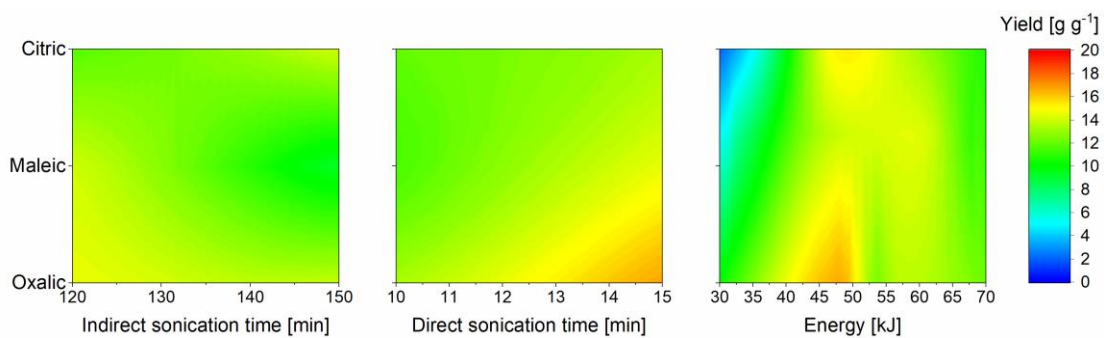

Figure S1. Surface response of yields to direct and indirect sonication, as well as to the accumulated energy delivered to the system.

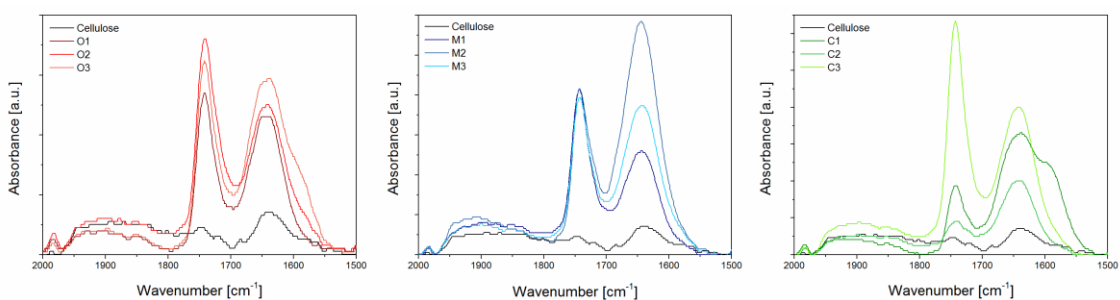

Figure S2. FTIR absorbance in the 2000-1500 cm<sup>-1</sup> region.

Table S1. Assignment and the bands position in the 3700 – 2800 cm<sup>-1</sup> region for all the cellulose samples<sup>1-4</sup>

| Assignment                                                                   | Cellulose | O1   | O2   | O3   | M1   | M2   | M3   | C1   | C2   | C3   |
|------------------------------------------------------------------------------|-----------|------|------|------|------|------|------|------|------|------|
| O(2)H...O(6) intramolecular hydrogen bonds stretching vibration              | 3419      | 3416 | 3415 | 3417 | 3417 | 3417 | 3417 | 3415 | 3415 | 3415 |
| O(3)H...O(5) intramolecular stretching vibration                             | 3342      | 3343 | 3343 | 3343 | 3344 | 3344 | 3344 | 3344 | 3344 | 3346 |
| O(6)H...O(3) intermolecular in cellulose I <sub>β</sub> stretching vibration | 3271      | 3278 | 3276 | 3276 | 3276 | 3276 | 3278 | 3279 | 3279 | 3274 |
| O(6)H...O(3) intermolecular in cellulose I <sub>α</sub> stretching vibration | 3213      | 3222 | 3222 | 3222 | 3221 | 3221 | 3221 | 3221 | 3221 | 3221 |
| asymmetric CH <sub>3</sub> stretching vibration                              | 2963      | 2966 | 2967 | 2967 | 2967 | 2967 | 2967 | 2967 | 2967 | 2969 |
| asymmetric CH <sub>2</sub> stretching vibration                              | 2944      | 2943 | 2942 | 2942 | 2940 | 2940 | 2940 | 2943 | 2944 | 2944 |
| symmetric CH <sub>3</sub> stretching vibration                               | 2903      | 2905 | 2908 | 2905 | 2905 | 2920 | 2908 | 2904 | 2904 | 2907 |
| symmetric CH <sub>2</sub> stretching vibration                               | 2860      | 2859 | 2854 | 2856 | 2856 | 2852 | 2856 | 2858 | 2858 | 2853 |

Table S2. Assignment and the bands position in the 1850 – 700 cm<sup>-1</sup> region for all the cellulose samples <sup>1-4</sup>

| Assignment                                                                       | Cellulose | O1   | O2   | O3   | M1   | M2   | M3   | C1   | C2   | C3   |
|----------------------------------------------------------------------------------|-----------|------|------|------|------|------|------|------|------|------|
| C=O anhydride stretching vibration                                               |           | 1806 | 1806 | 1808 | 1804 | 1808 | 1811 | 1810 | 1801 | 1801 |
| C=O bond in carbonyl, ester and acetyl groups stretching vibration               |           | 1736 | 1739 | 1746 | 1744 | 1740 | 1738 | 1735 | 1738 | 1742 |
| C=O in carboxylic acids stretching vibration                                     |           | 1673 | 1687 | 1682 | 1682 | 1683 | 1682 | 1681 | 1683 | 1882 |
| Water molecules stretching vibration                                             | 1639      | 1638 | 1629 | 1643 | 1638 | 1635 | 1638 | 1635 | 163  | 1640 |
| carboxylate (-COO <sup>-</sup> ) asymmetrical stretching vibration               |           | 1563 | 1573 | 1568 | 1566 | 1569 | 1567 | 1564 | 1567 | 1562 |
| C-H deformation vibration                                                        | 1464      | 1461 | 1459 | 1461 | 1461 | 1492 | 1461 | 1460 | 1461 | 1464 |
| C-H deformation vibration                                                        | 1431      | 1429 | 1428 | 1424 | 1427 | 1430 | 1427 | 1428 | 1428 | 1427 |
| C-H deformation vibration                                                        | 1374      | 1372 | 1372 | 1371 | 1372 | 1378 | 1372 | 1371 | 1371 | 1370 |
| C-H stretching vibration                                                         | 1318      | 1318 | 1318 | 1317 | 1317 | 1319 | 1317 | 1317 | 1317 | 1315 |
| C-O stretching vibration                                                         | 1277      | 1277 | 1277 | 1278 | 1278 | 1268 | 1278 | 1276 | 1278 | 1278 |
| C-O-C stretching mode of the pyranose ring                                       | 1243      | 1241 | 1242 | 1242 | 1242 | 1225 | 1242 | 1241 | 241  | 1241 |
| C-O-C stretching mode of the pyranose ring                                       | 1205      | 1205 | 1206 | 1206 | 1205 | 1208 | 1205 | 1205 | 1205 | 1205 |
| C-O-C stretching vibration in cellulose<br>C-O from esters                       | 1168      | 1163 | 1163 | 1164 | 1163 | 1164 | 1163 | 1163 | 1163 | 1162 |
| glucose ring stretching vibration                                                | 1118      | 1114 | 1114 | 1115 | 1114 | 1118 | 1114 | 1113 | 1113 | 1114 |
| C-O stretching mainly from C(3)-O(3)H                                            | 1062      | 1062 | 1063 | 1063 | 1063 | 1063 | 1063 | 1063 | 1063 | 1063 |
| C-O stretching ring                                                              | 1025      | 1027 | 1027 | 1026 | 1028 | 1032 | 1028 | 1028 | 1028 | 1026 |
| C-O stretching vibration                                                         | 982       | 991  | 991  | 991  | 990  | 990  | 991  | 991  | 991  | 991  |
| β-glucosidic linkage between the sugar units                                     | 939       | 930  | 928  | 930  | 930  | 930  | 930  | 929  | 929  | 932  |
| β-glucosidic linkage between the sugar units in<br>hemicelluloses and celluloses | 893       | 897  | 899  | 895  | 896  | 907  | 896  | 897  | 897  | 893  |
| O-H out of plane bending in cellulose I <sub>α</sub>                             | 753       | 760  | 760  | 760  | 760  | 757  | 760  | 759  | 759  | 759  |
| O-H out of plane bending in cellulose I <sub>β</sub>                             | 715       | 713  | 713  | 713  | 712  | 712  | 712  | 712  | 712  | 712  |

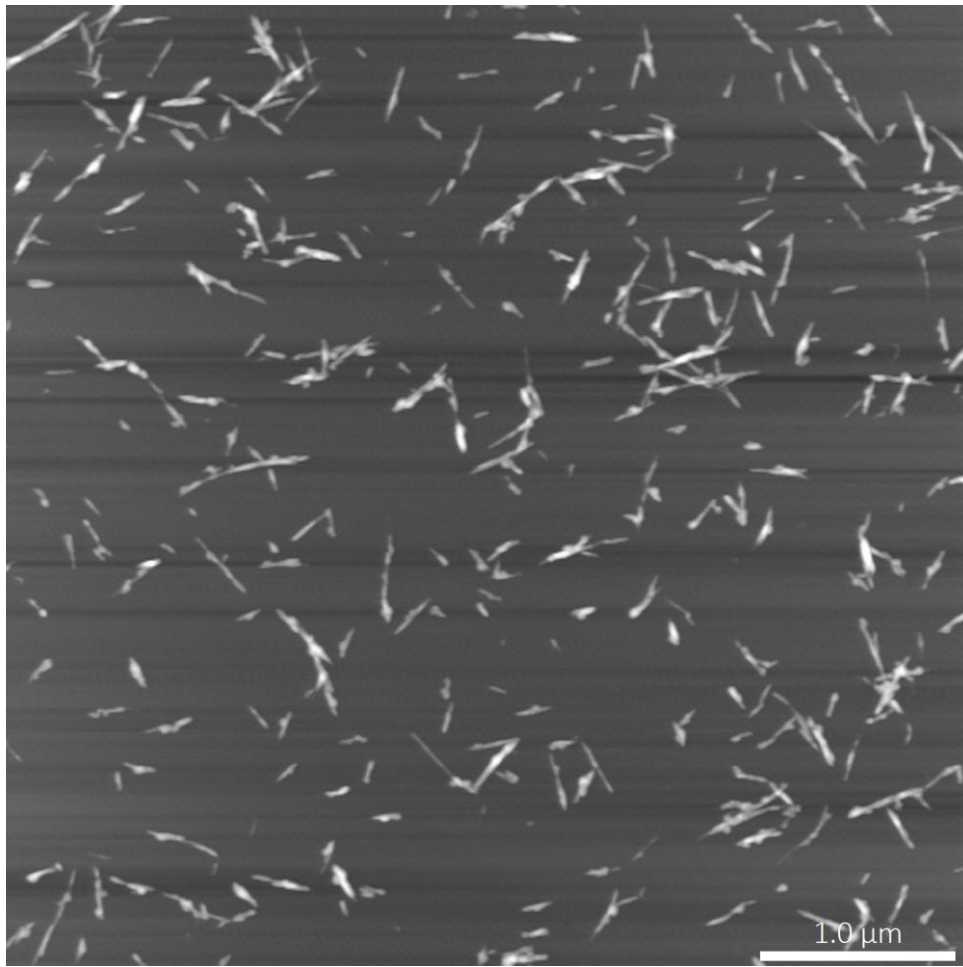

Figure S3. AFM image of S1 sample.

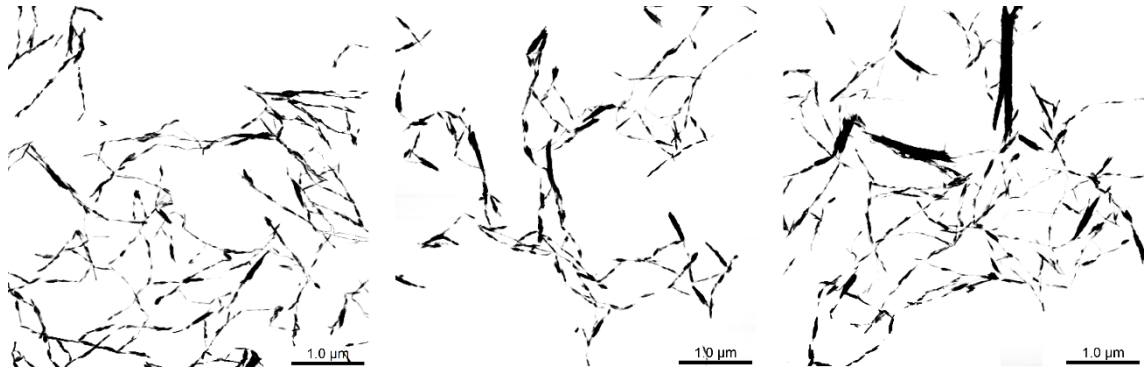

Figure S4. AFM two-tone images of three C1 samples.

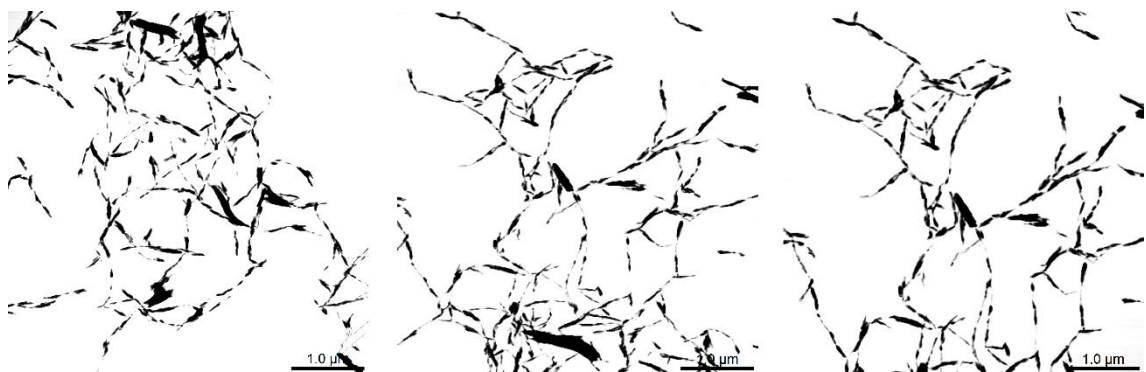

Figure S5. AFM two-tone images of three C2 samples.

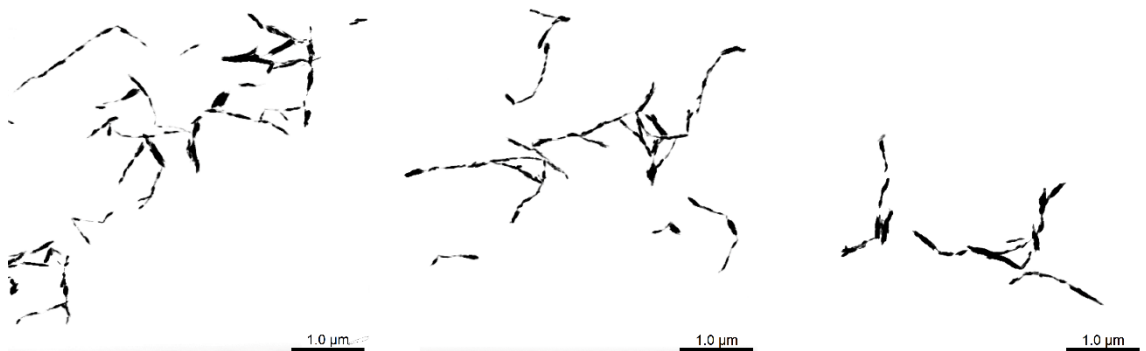

Figure S6. AFM two-tone images of three C3 samples.

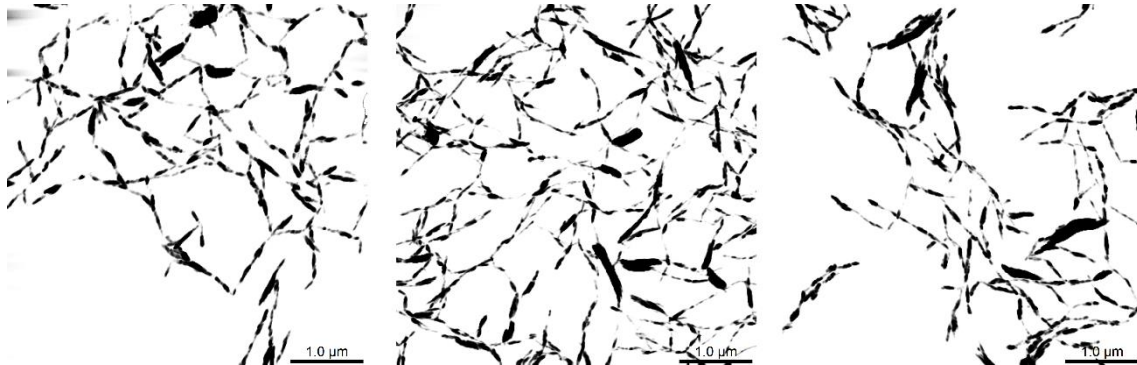

Figure S7. AFM two-tone images of three M1 samples.

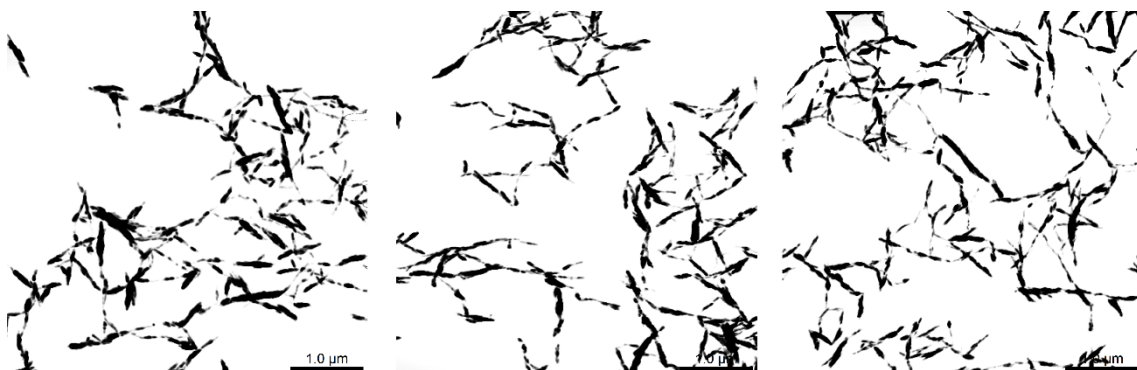

Figure S8. AFM two-tone images of three M2 samples.

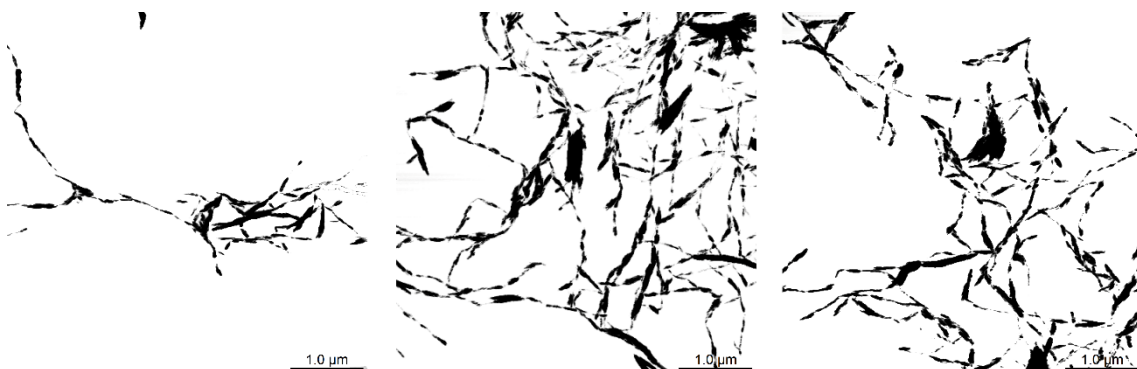

Figure S9. AFM two-tone images of three M3 samples.

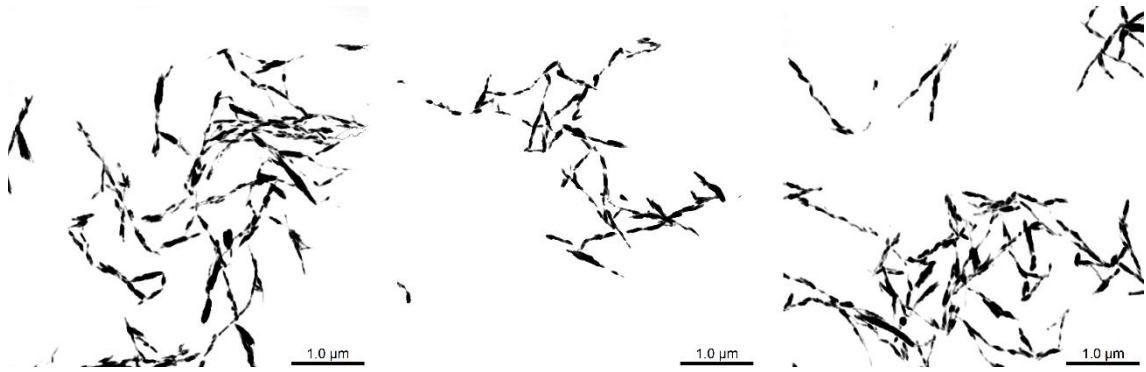

Figure S10. AFM two-tone images of three O1 samples.

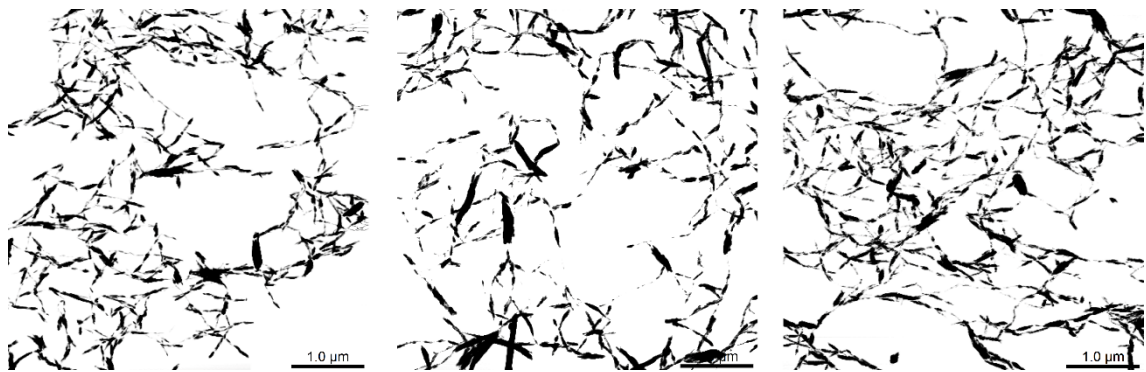

Figure S11. AFM two-tone images of three O2 samples.

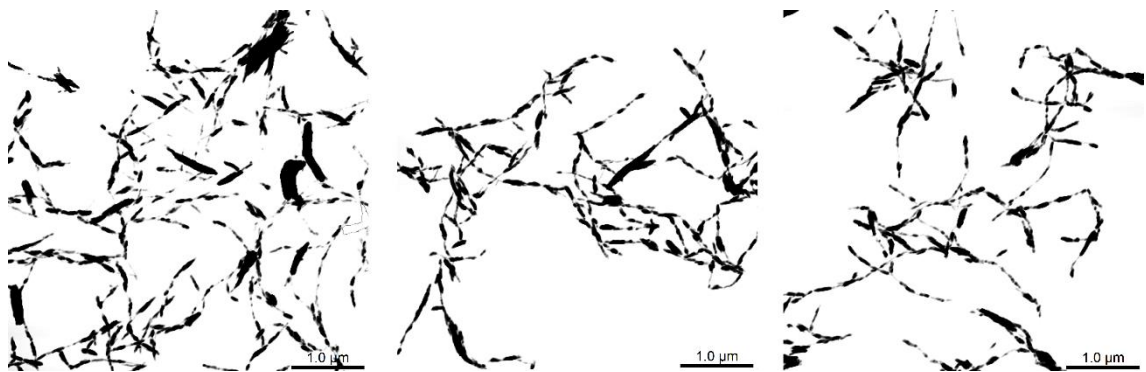

Figure S12. AFM two-tone images of three O3 samples.



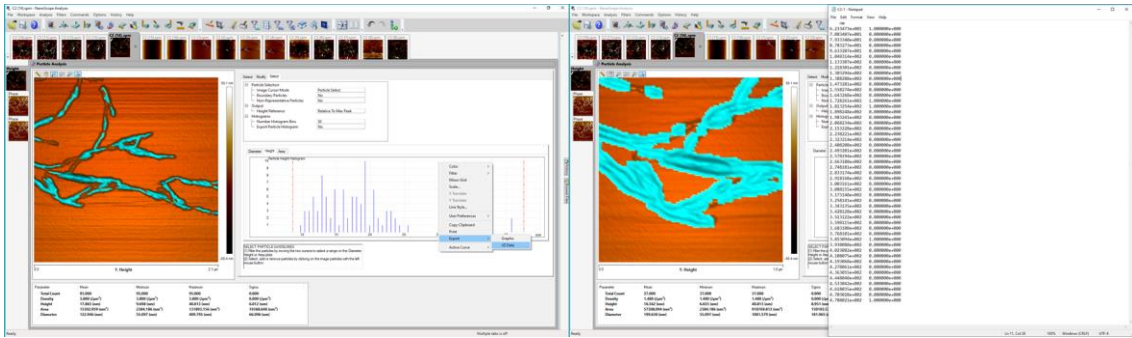

Figure S13. Parameters for automatic measurement with Bruker NanoScope Analysis.

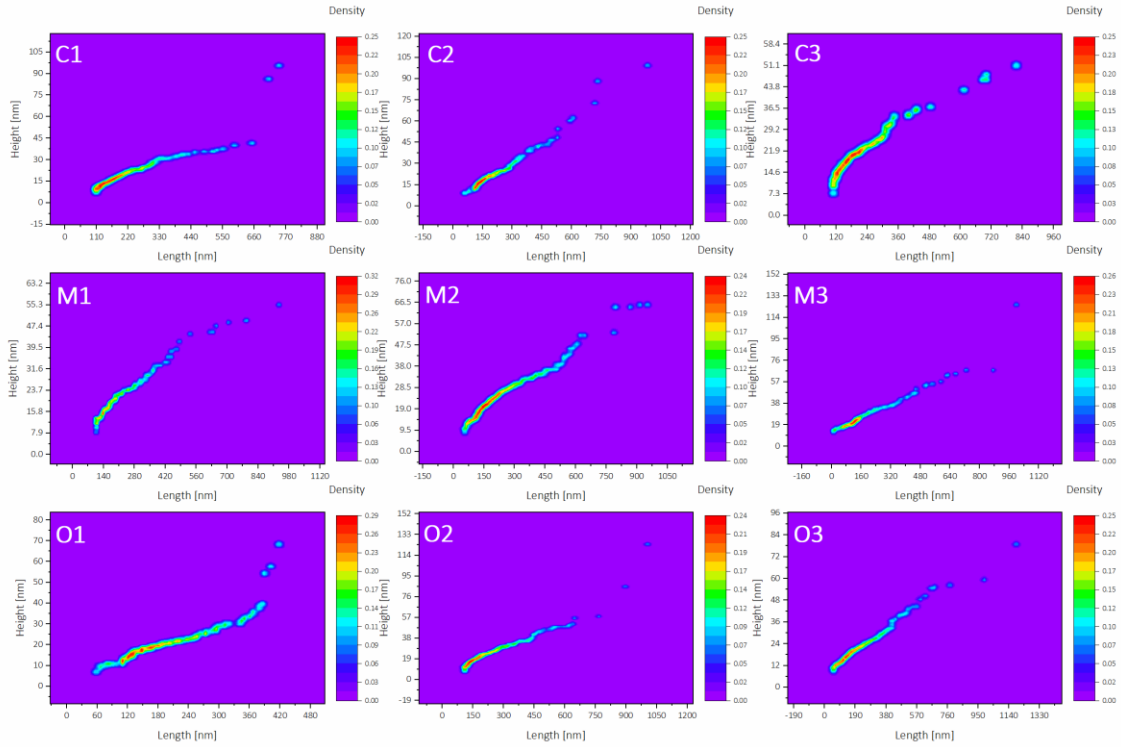

Figure S14. 2D kernel density plot for width vs. height of the nanocelluloses.

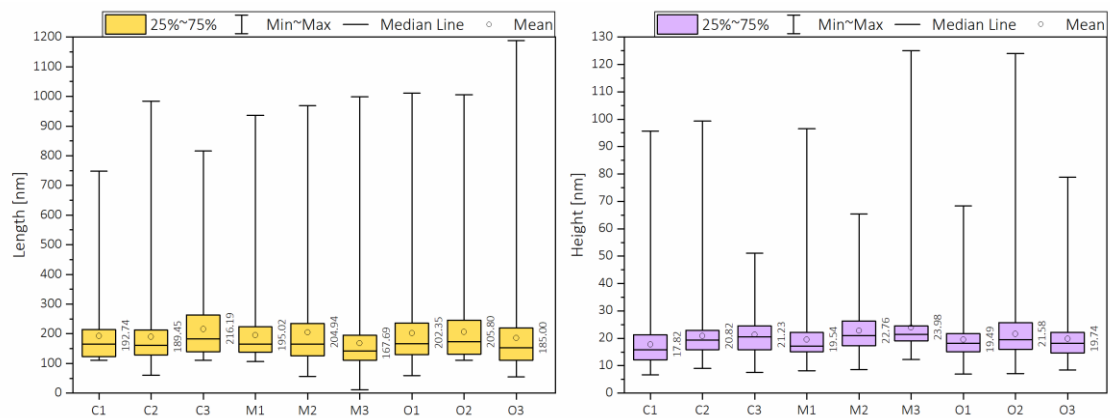

Figure S15. Box chart of length and height as measured automatically, the box contains specimens within the 25%~75% quartiles, with mean values besides.

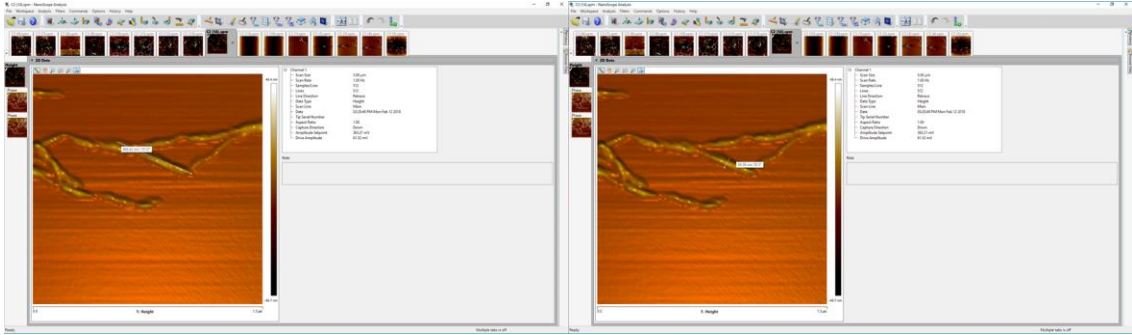

Figure S16. Parameters for manual measurement of the nanocelluloses using Bruker NanoScope Analysis.

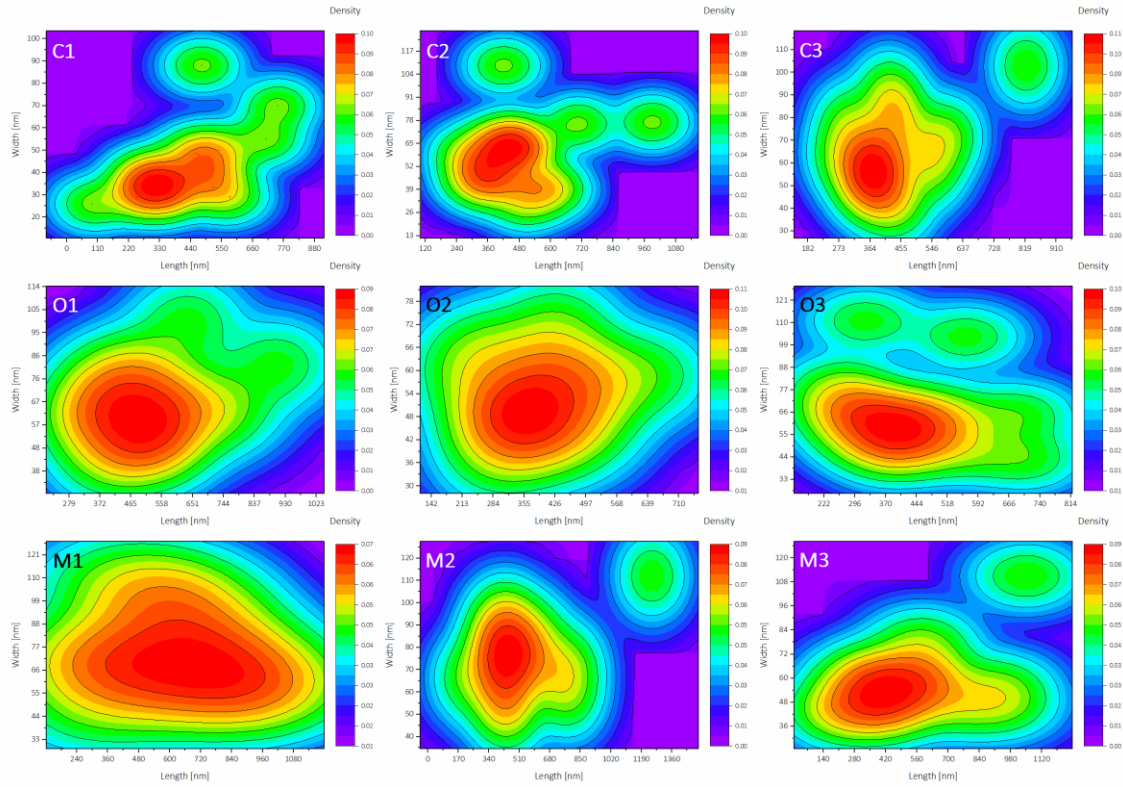

Figure S17. 2D kernel density plot for width vs. length of the nanocelluloses.

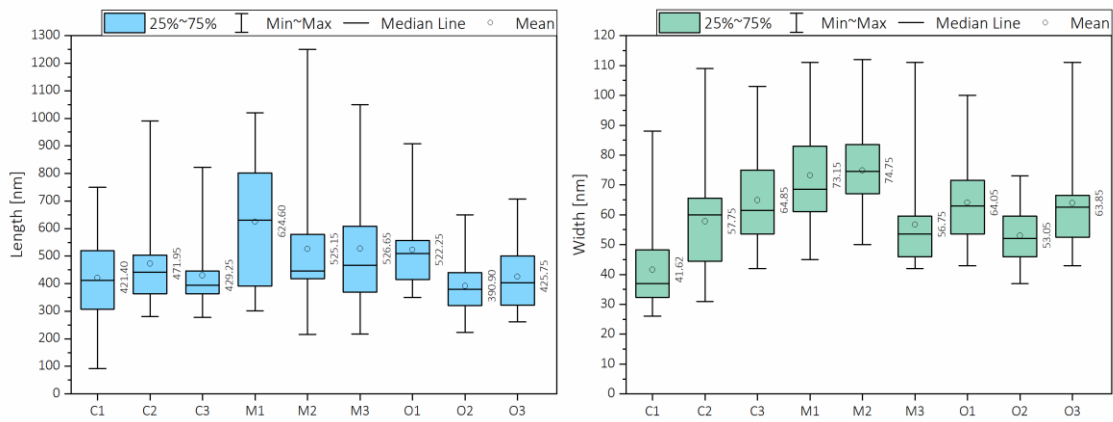

Figure S18. Box chart of length and height as measured manually, the box contains specimens within the 25%~75% quartiles, with mean values besides.

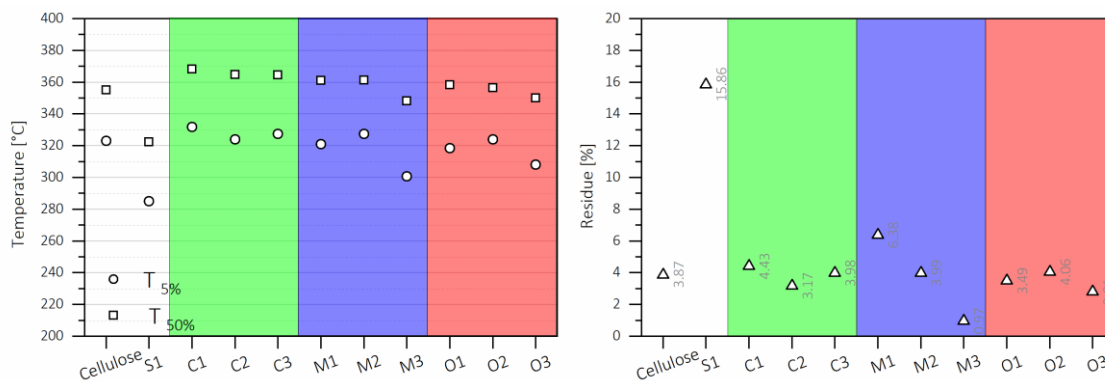

Figure S19. Transition temperatures and carbon residue as obtained from TG analysis.

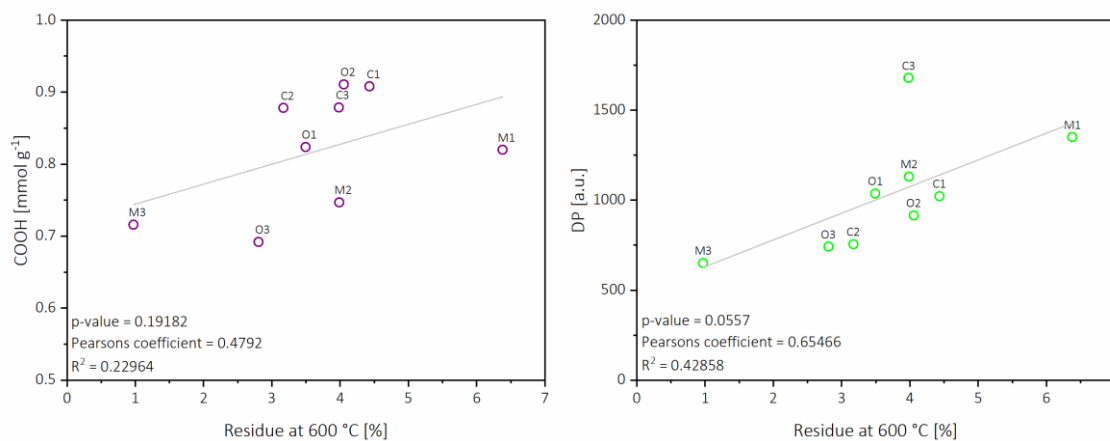

Figure S20. Correlation between residues at 600 °C and carboxylic content and degree of polymerization.

## References

- 1 C.-M. Popescu, M.-C. Popescu, G. Singurel, C. Vasile, D. S. Argyropoulos and S. Willfor, *Appl. Spectrosc.*, 2007, **61**, 1168–77.
- 2 C.-M. Popescu, P. T. Larsson, N. Olaru and C. Vasile, *Carbohydr. Polym.*, 2012, **88**, 530–536.
- 3 J. Sugiyama, J. Persson and H. Chanzy, *Macromolecules*, 1991, **24**, 2461–2466.
- 4 M. Koyama, J. Sugiyama and T. Itoh, *Cellulose*, 1997, **4**, 147–160.
